# Supplementary material for: ComE, an Essential Response Regulator, Negatively Regulates the Expression of the Capsular Polysaccharide Locus and Attenuates the Bacterial Virulence in Streptococcus pneumoniae
Source: PubMed Central journal article supplement (PMC5339220; doi:10.3389/fmicb.2017.00277), 2017-03-07
Supplement: Image1.pdf [file Image1.pdf]

1 **Figure S1 Genetic architecture of the *cps* locus in *S. pneumoniae*.** (A) The locus  
2 shown is representative of the Wzy-dependent capsule cassette of serotype 2. The  
3 capsule locus, ~15 kb in size, is located between the conserved genes *dexB* and *aliA*  
4 and is flanked on either side by insertion sequences (IS). *Cps2A-2D* are highly  
5 conserved across most serotypes. Serotype-specific genes encode all enzymes  
6 required to synthesize serotypespecific capsular polysaccharides. (B) Sequences of the  
7 promoter for D39. The transcriptional start site for the promoter *P<sub>cps</sub>* is assigned +1  
8 and other positions are numbered accordingly. The initiation codon of *cps2A* is  
9 indicated with an arrow. The primer pair of *P<sub>cps</sub>-F* and *P<sub>cps</sub>-R* is indicated with an  
10 arrow underline, which is used to prepare C2 probe for DNA affinity  
11 chromatography-pull down analysis.

12  
13 **Figure S2 Isolating and identifying binding proteins to *cps* promoter.** (A)  
14 SDS-PAGE analysis of *S. pneumoniae* cytoplasmic proteins fished out by affinity  
15 chromatography using *cps* promoter DNA probe (C2) as bait. M, mass maker; Lane  
16 c1 and c2 were eluted with NaCl at 100mM and 200mM under inducing conditions,  
17 and lane k1 and k2, as blank magnetic beads control, respectively. Proteins were  
18 stained with Coomassie Blue Staining. Numbers on the lane indicate the enriched  
19 proteins excised and identified by MAIDI-TOF mass spectrometry. (B) The partial  
20 MS result proteins that are most likely chosen to be further studied. (C) The  
21 distribution of coverage rate of 24 proteins from the MS results. (D) Verifying the  
22 specific binding ability of candidate proteins to *cps* promoter by EMSA *in vitro*. The  
23 results showed that GntR, Tr-act, MarR, HU, 0410, and CcpA can bind specifically to *cps*  
24 promoter, but non-phosphorylated ComE can bind hardly to it.

25  
26 **Figure S3 Mimetic phosphorylated ComE.** (A) Shows the amino acid sequence of  
27 ComE. The enriched protein from the 13 sample is identified as response regulator  
28 ComE with 78.4% coverage rate by MALDI-TOF MS analysis. The consistent amino  
29 acids sequence with MS is indicated with red italic underline text. (B) Phosphorylated  
30 mimetic mutant ComE<sup>D58E</sup> is constructed by site-directed mutagenesis of *comE* *in*

31 *vitro*. The molecular structure of mimetic site amino (Glu) is showed above the  
32 nucleotide of comE. The site-directed mutagenesis nucleotide (G) and primer  
33 sequence are indicated with box and red underline, respectively. (C)EMSA of  
34 ComE<sup>D58E</sup> binding to *cps* promoter sequence (C2 probe).The result shows that the  
35 ComE<sup>D58E</sup> exhibits significantly improved binding affinity for *cps* promoter sequence.  
36

37 **Figure S4 The role of phosphorylation of ComE in regulating the CPS**  
38 **production. (A)** Identification of D39ΔcomD、 D39ΔcomE、 D39ΔcomD::comE<sup>D58E</sup>  
39 and D39ΔcomE::comE<sup>D58E</sup> mutants by PCR. **(B)** Detection of CPS production in D39  
40 and its mutants by Western blot. GAPDH is detected as an internal control for  
41 constitutively expressed gene. The ratio of gray values of each sample CPS to  
42 GAPDH is calculated. The results of representative experiments are presented as  
43 means of three replicates ± standard deviations. \*\*,  $P < 0.01$ . **(C)** Neufeld test for  
44 D39-WT and its mutants. The mean capsule thickness from 100 swelling cells is  
45 measured with Image J software: D39-WT (0.4678±0.0985μm) 、 D39ΔcomE  
46 (0.6271±0.1343μm) 、 D39ΔcomD (0.6530±0.1149μm) and  
47 D39ΔcomD::comE<sup>D58E</sup>(0.4778±0.0846μm).The statistical result shows that the  
48 average swelling capsule thickness of D39ΔcomE mutant and D39ΔcomD are  
49 significantly increased compared with that of D39-WT (\*\*,  $p < 0.01$ ). These results  
50 indicate that the phosphorylation of ComE impact on the CPS production.

51  
52

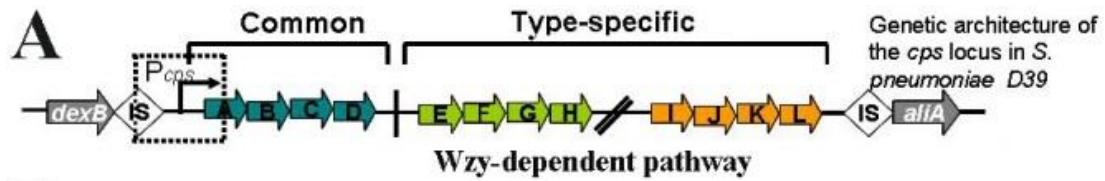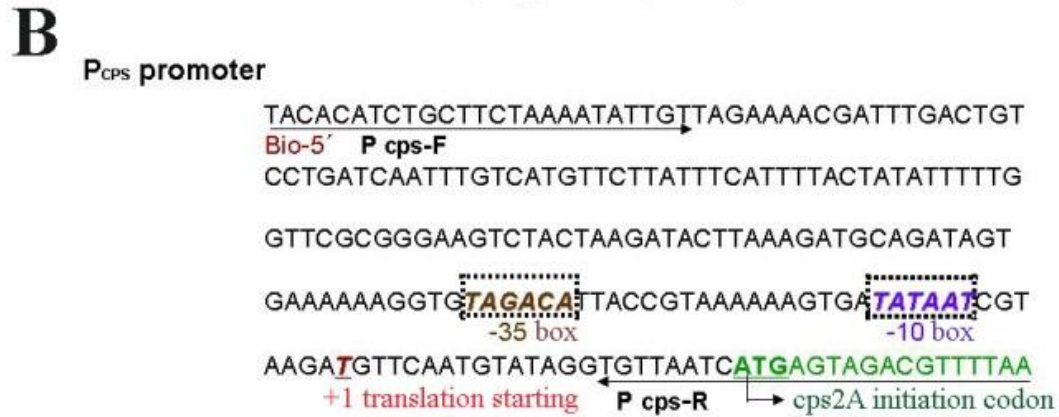

Figure S1 JPEG

53  
54  
55

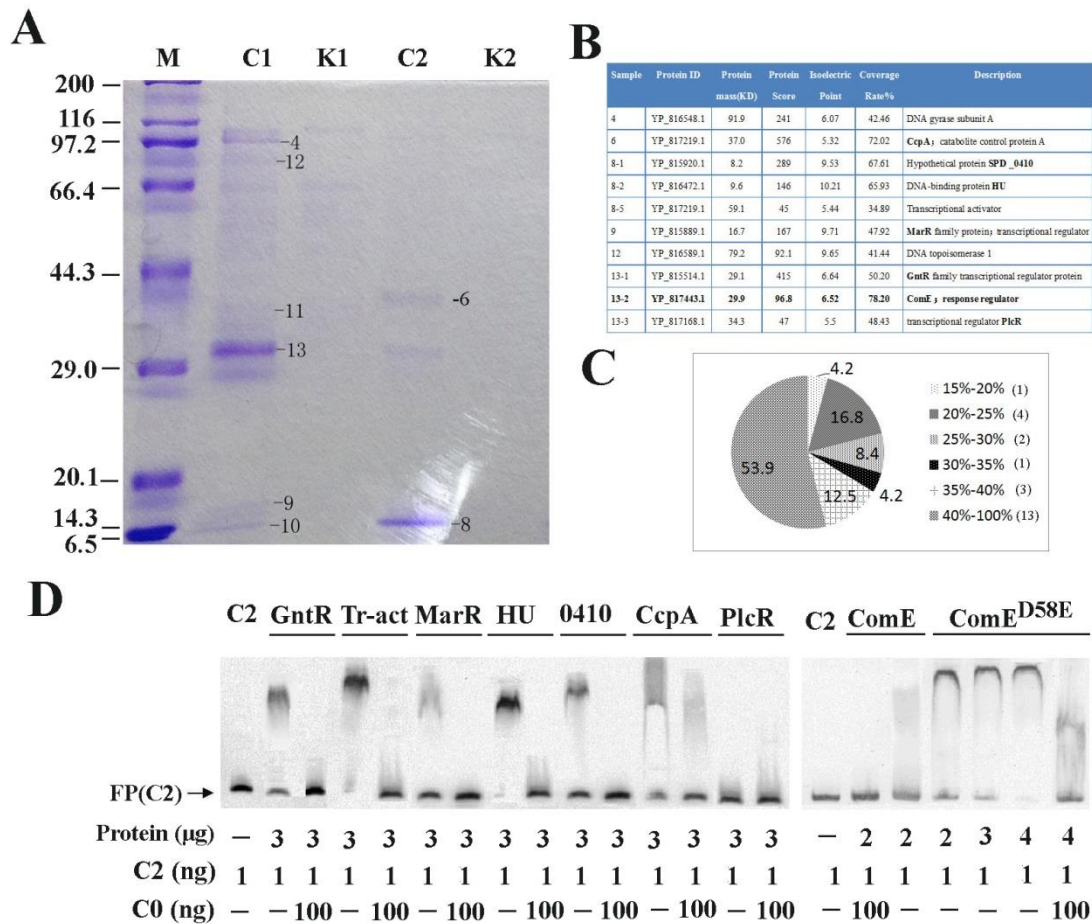

Figure S2. JPEG

**A**

MKULILEDWIEHQVRLERILDEISKESNPISIKITGKUREFEFYIENDEVNQLYFLDDIHGEEKGFEVAQLRHYNPYAHVFTSRSEF  
 ATLTYKIQVSAIDFVYDKDINDEMFKKRIEQNIIFYKSMLEENEDVYDIFDYNKGNDLKIPYHDILYIETTG' SHKLRUJGKNFAKEFY  
 GTMTDIQEKDAHTQRFYSPHKSFLVYNGNREIDRKNLEIVFYEDHRCPISRKIRKRLKDIIEKKSQK

**B**

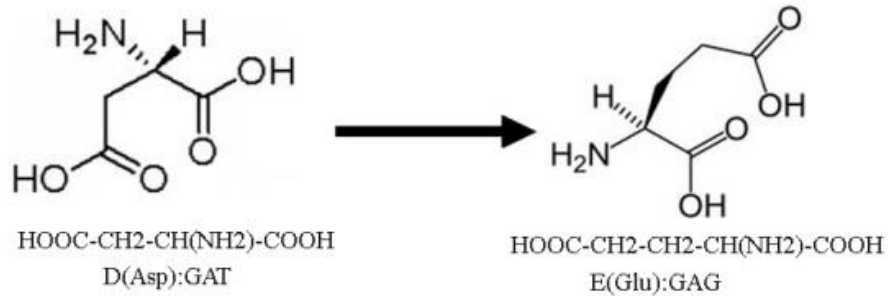

ATGAAA GTTTTAA TTTTGA A GAT GTTATT GAACATCAA GTGAGACTAGAGAGAATATTGGATGAAATT  
 TCGAAA GAATCGAATATTTCCA ATATCATACAAGACAACGGGAAAA GTCCGTGAATTTGAAAGAATACAT  
 TGAAA ATGATGAAAGTAAATCAGCTTTATTTCTAGAGATCGATATTCATGGAATTGAGAAAAAGGGATT  
 TGAA GTGGCTCAGCTC ATTCGTCATTACAATCCTTACGCTATTATCGTCTTTATCACTAGTCGATCAGAG  
 TTTGC GACTCTAAC ATATAA ATACCA GGTATCAGCCCTA GATTTT GTTGATAAGGATATCAATGATGAGA  
 TGTTTAA GAA GAGA ATTGAGCAAAAATATCTTCTACACGAAAGATATGTTACTTGAAAATGAA GATGTT  
 GTA GATTATTTTCGACTACAATTACAA GGGAA ATGATTTAAAAA ATTCCTTACC ATGATATTTTGTATATTG  
 AAACAACA GGGGTATCTC ATAAAATTGCGCATTATTGGTAA GAAATTTGCAAAAAGAGTTTTATGGTACCA  
 TGACAGATATTCAGGAAAAGGACAAAACATACTCAGCGATTTTATTCTCCTCACAAATCATTTTGGTAA  
 ATATAGGCAATATCAGAGAAATTGATCGAAAAA ACTTAGAAAATTGTTTCTATGAA GACCATCGTTGTC  
 CTATTTCAA GATTAAAAATTA GAAAATTA AAA GATATTTTA GAGAAAAAATCTCAAAA GTGA

**C**

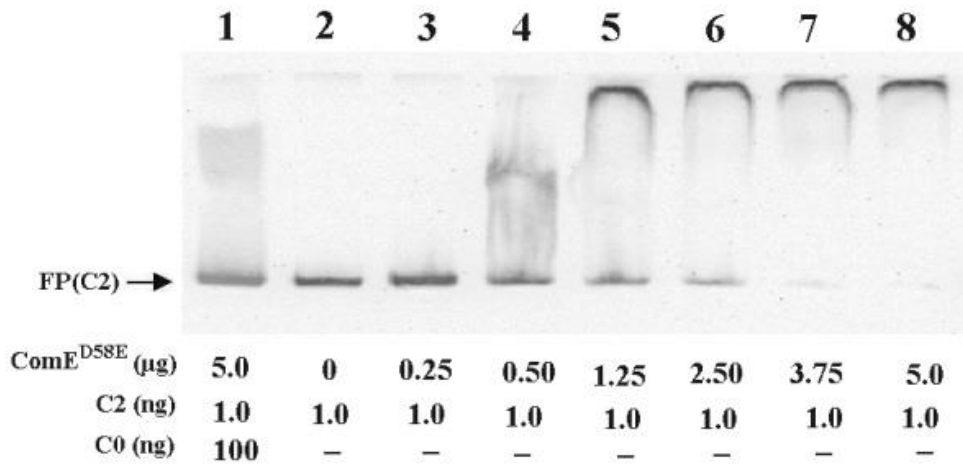

Figure S3. JPEG

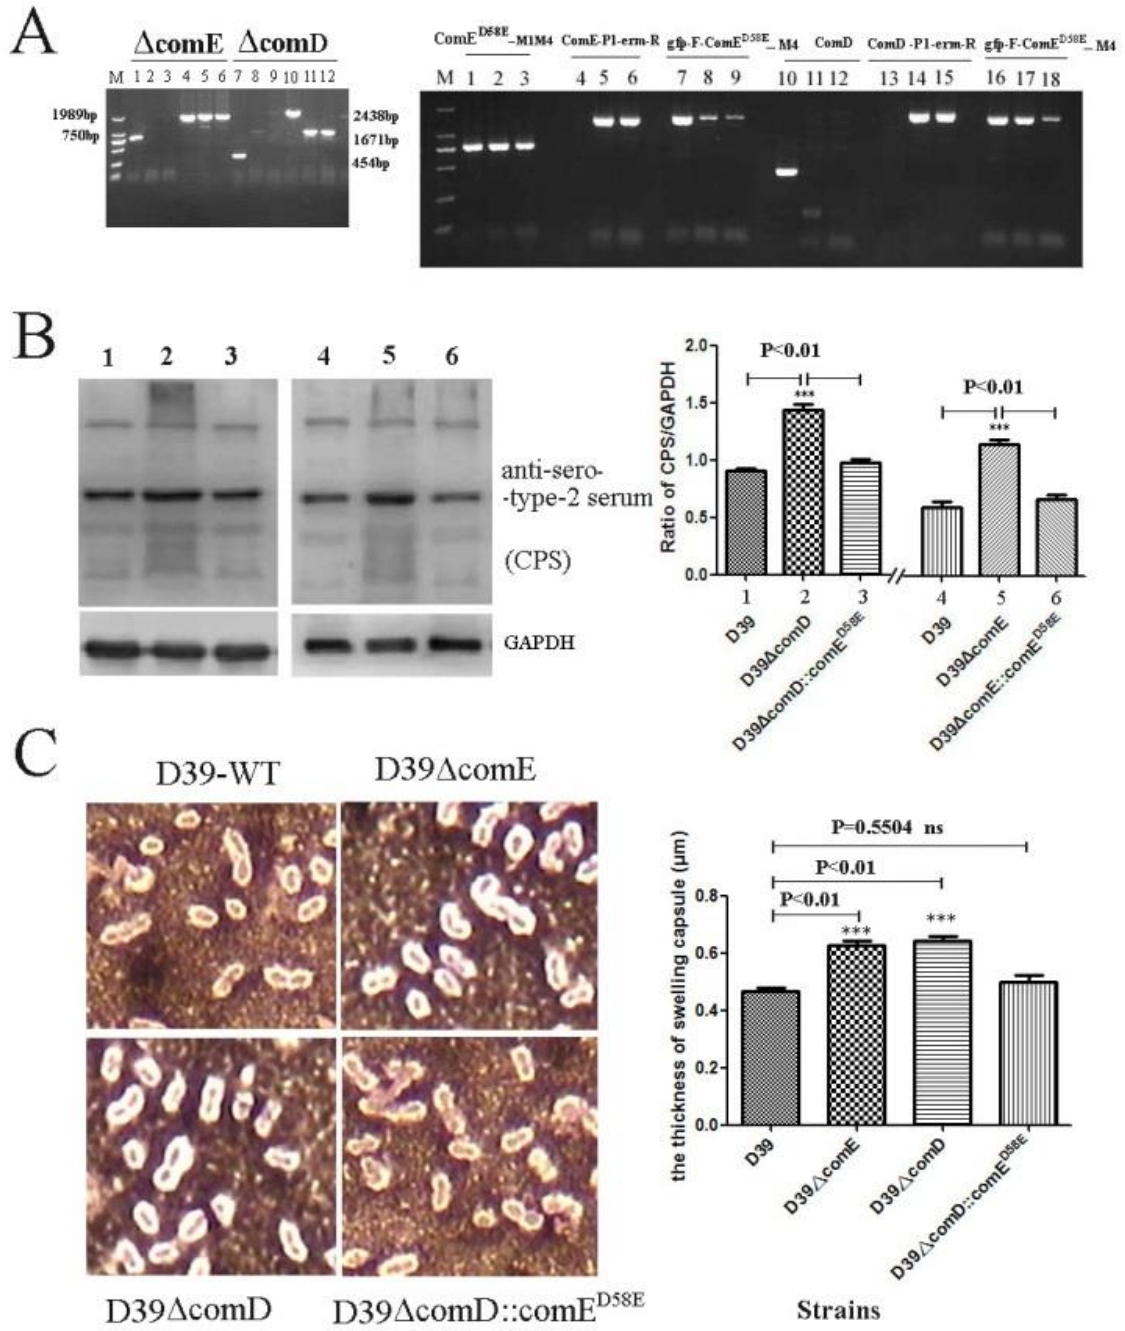

Figure S4. JPEG
